# Supplementary material for: How Prefrail Older People Living Alone Perceive Information and Communications Technology and What They Would Ask a Robot for: Qualitative Study
Source: PubMed Central journal article supplement (PMC6701159; doi:10.2196/13228), 2019-08-06
Supplement: jmir_v21i8e13228_app2.pdf [file jmir_v21i8e13228_app2.pdf]

| Variable                          | Value                        | Value description                                                                                                                                                                                                              |
|-----------------------------------|------------------------------|--------------------------------------------------------------------------------------------------------------------------------------------------------------------------------------------------------------------------------|
| <b>Autonomy in managing money</b> |                              |                                                                                                                                                                                                                                |
|                                   | <b>Dependent</b>             | No autonomy in managing money and economic/bank activities and helped by a son/daughter or someone else.                                                                                                                       |
|                                   | <b>Partially dependent</b>   | Autonomy in managing money but she/he receives support for more complex economic/bank activities.                                                                                                                              |
|                                   | <b>Independent</b>           | Complete autonomy in managing money and economic/bank activities.                                                                                                                                                              |
| <b>Autonomy in shopping</b>       |                              |                                                                                                                                                                                                                                |
|                                   | <b>Dependent</b>             | She/he receives help in shopping/no autonomy.                                                                                                                                                                                  |
|                                   | <b>Partially dependent</b>   | She/he receives some help, i.e. doesn't carry heavy things that are taken home by others, or buys by his/her self but uses home delivery services <b>and/or</b> she/he receives meals from a service offered by the town hall. |
|                                   | <b>Independent</b>           | She/he buys and goes shopping on her/his own.                                                                                                                                                                                  |
| <b>Diet</b>                       |                              |                                                                                                                                                                                                                                |
|                                   | <b>Inadequate</b>            | Less than 3 meals a day <b>and</b> not balanced/poor quality of the diet.                                                                                                                                                      |
|                                   | <b>Partially adequate</b>    | Less than 3 meals a day with balanced dishes <b>or</b> 3 meals but not balanced/poor quality of the diet.                                                                                                                      |
|                                   | <b>Adequate</b>              | 3 meals a day <b>and</b> a balanced diet.                                                                                                                                                                                      |
| <b>Help for housekeeping</b>      |                              |                                                                                                                                                                                                                                |
|                                   | <b>Never</b>                 | No help for housekeeping.                                                                                                                                                                                                      |
|                                   | <b>Occasional</b>            | Once in a while.                                                                                                                                                                                                               |
|                                   | <b>Routinely but minimal</b> | One or more times a week for less than 3 hours a week.                                                                                                                                                                         |
|                                   | <b>Frequent</b>              | One or more times a week for less than 7 hours a week but for at least 3 hours a week.                                                                                                                                         |
|                                   | <b>Very frequent</b>         | Every day for at least 1 hours a day or not every day but at least 7 hours a week.                                                                                                                                             |
