# Supplementary material for: How Prefrail Older People Living Alone Perceive Information and Communications Technology and What They Would Ask a Robot for: Qualitative Study
Source: PubMed Central journal article supplement (PMC6701159; doi:10.2196/13228), 2019-08-06
Supplement: jmir_v21i8e13228_app3.pdf [file jmir_v21i8e13228_app3.pdf]

| Variable                                                                                                                    | Value               | Value description                                                                                                                         |
|-----------------------------------------------------------------------------------------------------------------------------|---------------------|-------------------------------------------------------------------------------------------------------------------------------------------|
| <b>Physical activity (intensity)</b>                                                                                        |                     |                                                                                                                                           |
|                                                                                                                             | <b>None</b>         | Never exercises and rarely goes out, only for medical examinations                                                                        |
|                                                                                                                             | <b>Weak</b>         | Very mild physical activity, i.e. sometimes goes for walks, mainly for errands.                                                           |
|                                                                                                                             | <b>Moderate</b>     | Sometimes exercises – once a week or less-and/or often goes out and walks at a good pace.                                                 |
|                                                                                                                             | <b>Good or high</b> | Follows regularly an exercise program and she/he goes out every day and walks at a good pace.                                             |
| <b>Quality of sleeping</b>                                                                                                  |                     |                                                                                                                                           |
|                                                                                                                             | <b>Bad</b>          | She/he says to sleep badly, for example not much ( $\leq 5$ hours) and/or with breaks/interruptions.                                      |
|                                                                                                                             | <b>Fair</b>         | She/he says to sleep quite well but for not many hours ( $\leq 5$ ) <b>or</b> many hours with some breaks/interruptions.                  |
|                                                                                                                             | <b>Good or high</b> | She/he says that she/he sleeps well and enough.                                                                                           |
| <b>Social life – level of engagement in social activities</b>                                                               |                     |                                                                                                                                           |
|                                                                                                                             | <b>None</b>         | She/he doesn't see/meet anybody.                                                                                                          |
|                                                                                                                             | <b>Weak</b>         | She/he sees/meets few people, only relatives/caregivers.                                                                                  |
|                                                                                                                             | <b>Moderate</b>     | She/he sees/meets people, not only relatives or caregivers, but also friends twice a week or less.                                        |
|                                                                                                                             | <b>Good or high</b> | She/he often goes out for social activities like having dinners, going to the theatre and/or attends circles, associations, parish etc... |
| <b>Desired monthly income [emerged from the answers to the “indirect” question number 14 of Interview grid (see Box 1)]</b> |                     |                                                                                                                                           |
|                                                                                                                             |                     | $\leq 1000$ €                                                                                                                             |
|                                                                                                                             |                     | 1000 € - 2000 €                                                                                                                           |
|                                                                                                                             |                     | $\geq 2000$ €                                                                                                                             |
