# Supplementary material for: How Prefrail Older People Living Alone Perceive Information and Communications Technology and What They Would Ask a Robot for: Qualitative Study
Source: PubMed Central journal article supplement (PMC6701159; doi:10.2196/13228), 2019-08-06

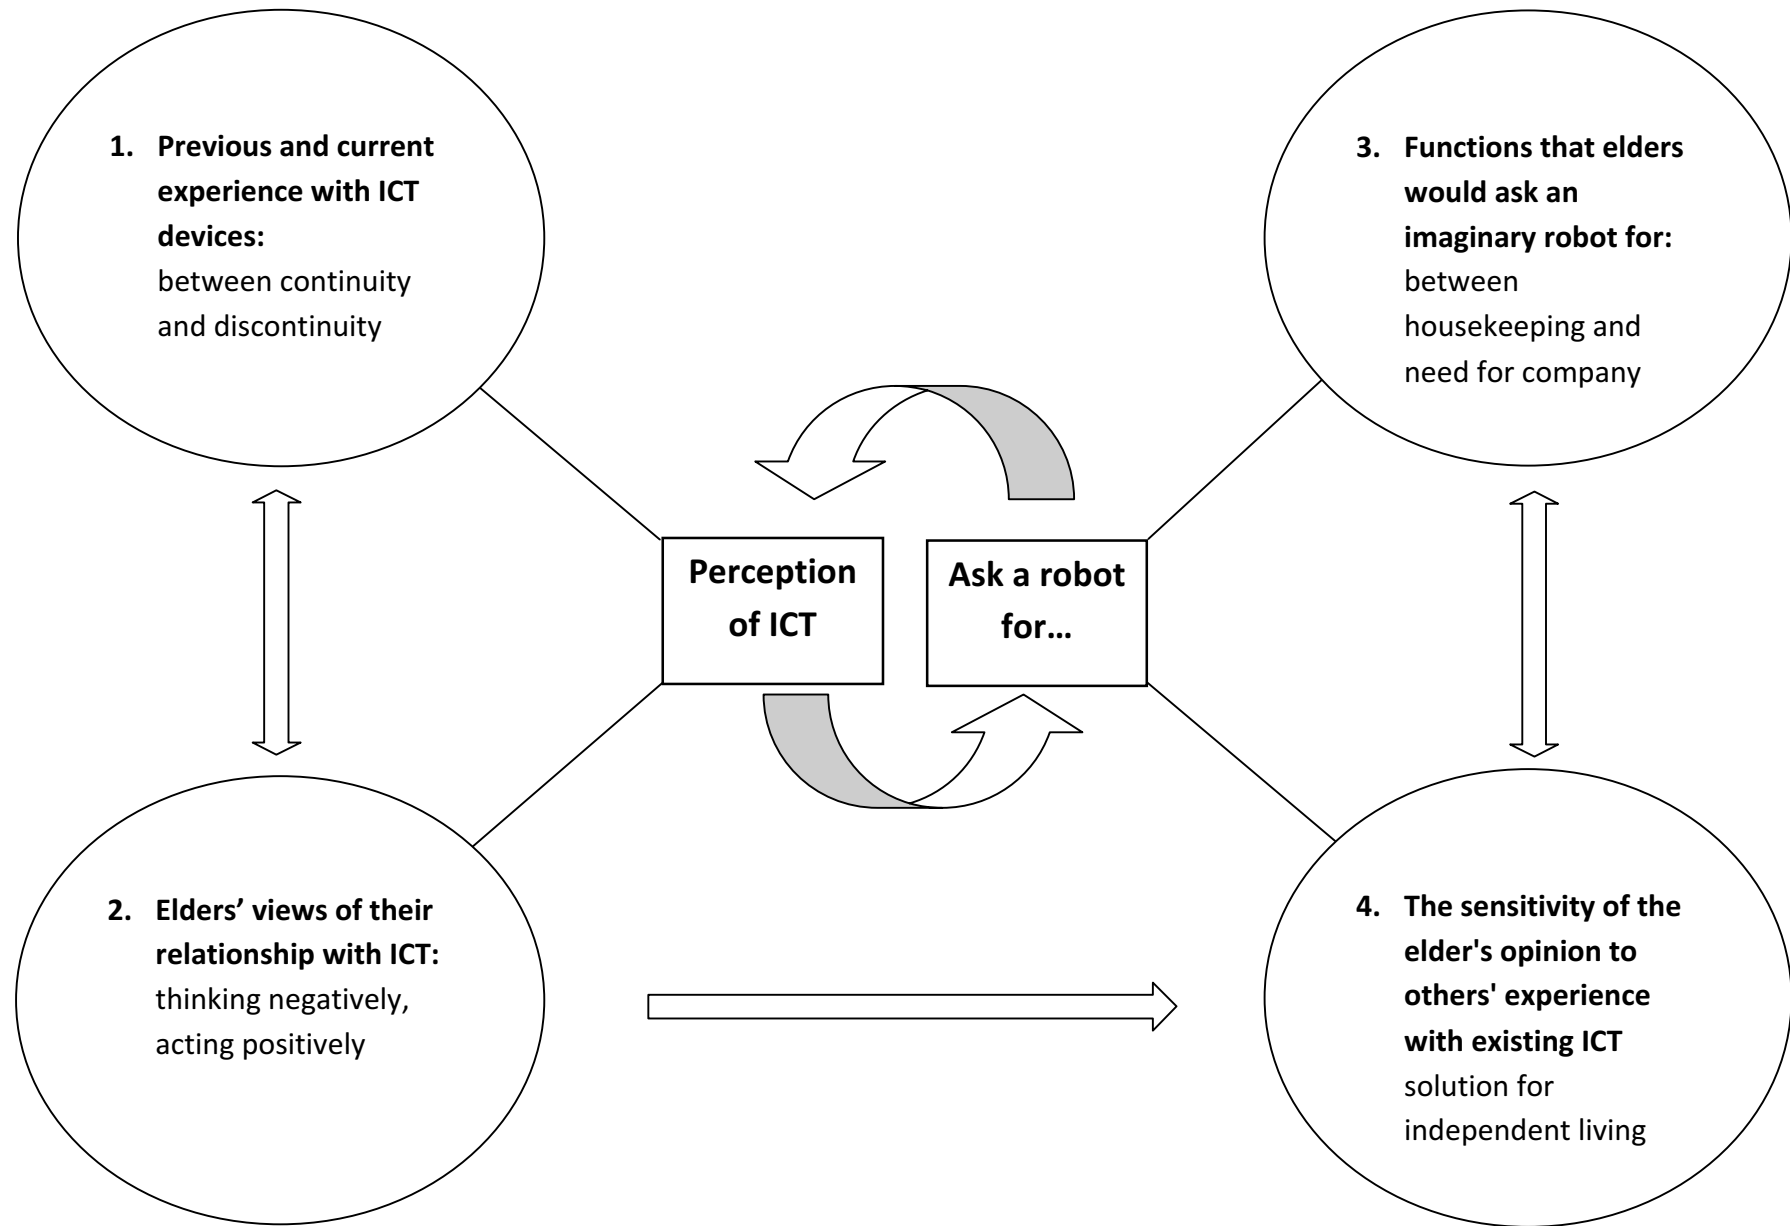

Supplement: jmir_v21i8e13228_app4.pdf [file jmir_v21i8e13228_app4.pdf]
